# Supplementary material
Source: PubMed Central journal article supplement (PMC5838565)
Supplement: jama-319-779-s002.pdf [file jama-319-779-s002.pdf]

## Supplementary Online Content

Jabre P, Penaloza A, Pinero D, et al. Effect of bag-mask ventilation vs endotracheal intubation during cardiopulmonary resuscitation on neurological outcome after out-of-hospital arrest : a randomized clinical trial. *JAMA*. doi:10.1001/jama.2018.0156

**eTable 1.** Number of Cases That each Investigator Centre Contributed

**eTable 2.** Post-Hoc Analyses

This supplementary material has been provided by the authors to give readers additional information about their work.

**eTable 1.** Number of Cases That Each Investigator Centre Contributed

| Number of cases that each investigator centre contributed – no. (%)** | BMV group<br>(N=1018) | ETI group<br>(N=1022) |
|-----------------------------------------------------------------------|-----------------------|-----------------------|
| N°1                                                                   | 119 (11.7)            | 114 (11.2)            |
| N°24                                                                  | 93 (9.1)              | 97 (9.5)              |
| N°5                                                                   | 79 (7.8)              | 77 (7.5)              |
| N°9                                                                   | 74 (7.3)              | 71 (7.0)              |
| N°12                                                                  | 72 (7.1)              | 74 (7.2)              |
| N°17                                                                  | 63 (6.2)              | 64 (6.3)              |
| N°13                                                                  | 61 (6.0)              | 61 (6.0)              |
| N°8                                                                   | 60 (5.9)              | 49 (4.8)              |
| N°3                                                                   | 56 (5.5)              | 56 (5.5)              |
| N°14                                                                  | 48 (4.7)              | 50 (4.9)              |
| N°22                                                                  | 41(4.0)               | 42 (4.1)              |
| N°11                                                                  | 40 (3.9)              | 45 (4.4)              |
| N°15                                                                  | 40 (3.9)              | 61 (6.0)              |
| N°23                                                                  | 37 (3.6)              | 38 (3.7)              |
| N°16                                                                  | 33 (3.2)              | 29 (2.8)              |
| N°18                                                                  | 29 (2.9)              | 24 (2.4)              |
| N°20                                                                  | 24 (2.4)              | 17 (1.7)              |
| N°25                                                                  | 20 (2.0)              | 15 (1.5)              |
| N°7                                                                   | 16 (1.6)              | 19 (1.9)              |
| N°6                                                                   | 13 (1.3)              | 16 (1.6)              |
| N°2                                                                   | 0 (0.0)               | 3 (0.3)               |

BMV = Bag-Mask Ventilation; ETI = endotracheal intubation

| <b>eTable 2. Post-Hoc Analyses</b>                                                                         |                     |                      |                |                                                               |                    |
|------------------------------------------------------------------------------------------------------------|---------------------|----------------------|----------------|---------------------------------------------------------------|--------------------|
| <b>Intention to treat population,</b>                                                                      | <b>BMV group</b>    | <b>ETI group</b>     | <b>P value</b> | <b>Absolute difference in percentages<br/>BMV(%) – ETI(%)</b> | <b>95% CI</b>      |
| <b>ECMO-CPR resuscitation and uncontrolled donation after circulatory determination of death excluded*</b> |                     |                      |                |                                                               |                    |
| <b>Survival with CPC ≤2 at day28, no. (%)</b>                                                              | <b>43/971 (4.4)</b> | <b>39/978 (4.0)</b>  | <b>0.63</b>    | <b>0.4</b>                                                    | <b>[-2.2, 1.3]</b> |
|                                                                                                            |                     |                      |                |                                                               |                    |
| <b>Intubated after BMV before ROSC considered in ETI group</b>                                             |                     |                      |                |                                                               |                    |
| <b>Survival with CPC ≤2 at day28, no. (%)</b>                                                              | <b>41/863 (4.8)</b> | <b>45/1174 (3.8)</b> | <b>0.31</b>    | <b>0.9</b>                                                    | <b>[-0.9, 2.7]</b> |

ECMO= extracorporeal membrane oxygenation; CPR= cardiopulmonary resuscitation; BMV bag mask ventilation; ETI endotracheal intubation; CPC cerebral performance categorization; ROSC return of spontaneous circulation.

\* uncontrolled donation means kidney grafts retrieval from non-heart-beating donor after out-of-hospital cardiac arrest.

P values were calculated by using Chi-square test or Fisher's exact test
